# Supplementary material
Source: PubMed Central journal article supplement (PMC2785161)
Supplement: supp_M109.054221_SupFig.pdf [file supp_M109.054221_SupFig.pdf]

## **Supplementary Information**

**ROS-GENERATING MITOCHONDRIAL DNA MUTATION UPREGULATES  
HYPOXIA-INDUCIBLE FACTOR-1 $\alpha$  GENE TRANSCRIPTION  
VIA PI3K-AKT/PKC/HDAC PATHWAY**

**Nobuko Koshikawa, Jun-Ichi Hayashi, Akira Nakagawara, and Keizo Takenaga**

**Table S1 Alignment of amino acid sequence of ND6**

|                                            | 10          | 20         | 25   | 30                 | 40                 |
|--------------------------------------------|-------------|------------|------|--------------------|--------------------|
| <i>Mus musculus</i> (Mouse)                | MNNYIFVLSS  | LFLVGCLGLA | LKPS | P                  | IYGGL GLIVSGFVGC ~ |
| P29 & P34 cells                            | MNNYIFVLSS  | LFLVGCLGLA | LKPS | P                  | IYGGL GLIVSGFVGC ~ |
| A11 & D6 cells                             | MNNYIFVLSS  | LFLVGCLGLA | L    | IYGGL GLIVSGFVGC ~ |                    |
| <i>Homo sapiens</i> (Human)                | MMYALFLLSV  | GLVMGFVGF  | SKPS | P                  | IYGGL VLIVSGVVG ~  |
| <i>Bos taurus</i> (Bovine)                 | MMLYIVFILSV | IFVMGFVGF  | SKPS | P                  | IYGGL GLIVSGGVGC ~ |
| <i>Gallus gallus</i> (Chicken)             | MTYFVIFLGI  | CFMLGLAVA  | SNPS | P                  | YGVV GLVVASVMGC ~  |
| <i>Xenopus laevis</i> (Frog)               | MIYMVSVSMM  | VLVLGLVAVA | SNPS | P                  | FYAAL GLVLAAGAGC ~ |
| <i>Danio rerio</i> (Zebra fish)            | MAFYLSFLMA  | ALVGGMIAIA | SNPA | P                  | YFAAF GLVVVAGVGC ~ |
| <i>Drosophila melanogaster</i> (Fruit fly) | MIQLMLYS    | LIITTSIIFL | NMIH | P                  | LALGL TLLIQTIFVC ~ |

G13997A mutation in the *ND6* gene changes evolutionary conserved proline-25 to leucine.

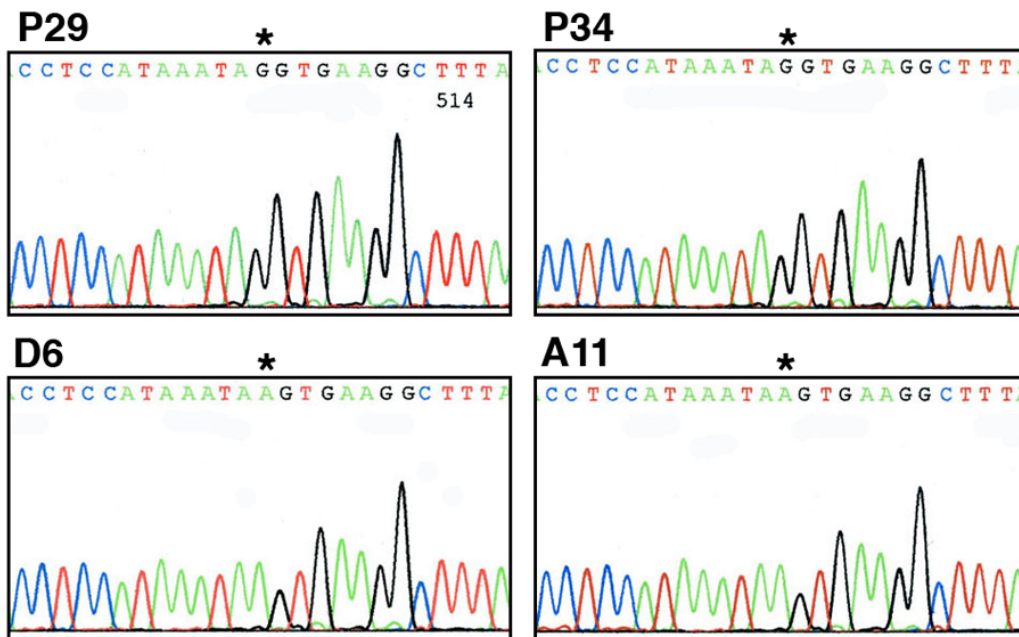

**Figure S1. G13997A mutation in the *ND6* gene found in high-metastatic D6 and A11 cells.**  
The asterisk indicates the position of the mutation.

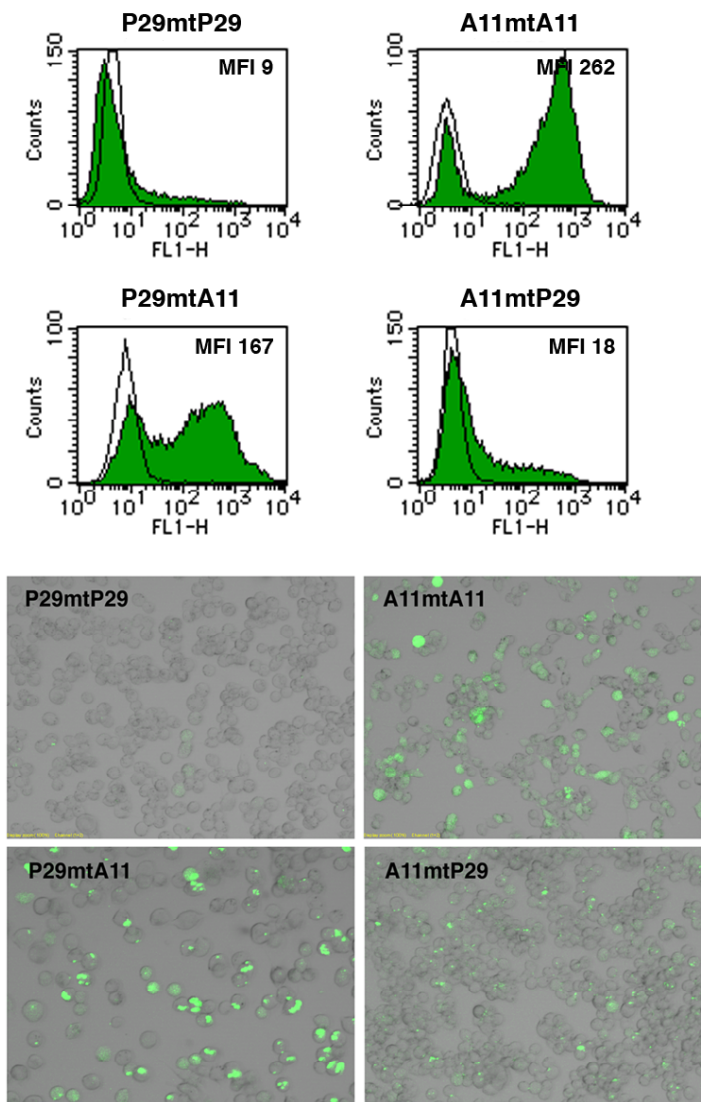

**Figure S2. ROS are overproduced in the cybrids with A11 mtDNA carrying a G13997A mutation in the *ND6* gene.** The cybrids were incubated with 10  $\mu$ M DCFH-DA for 10 min at 37°C in serum-free DMEM. ROS production was analyzed with a FACScan flow cytometer or visualized using a confocal laser microscope. Mean fluorescence intensity (MFI) was also shown.

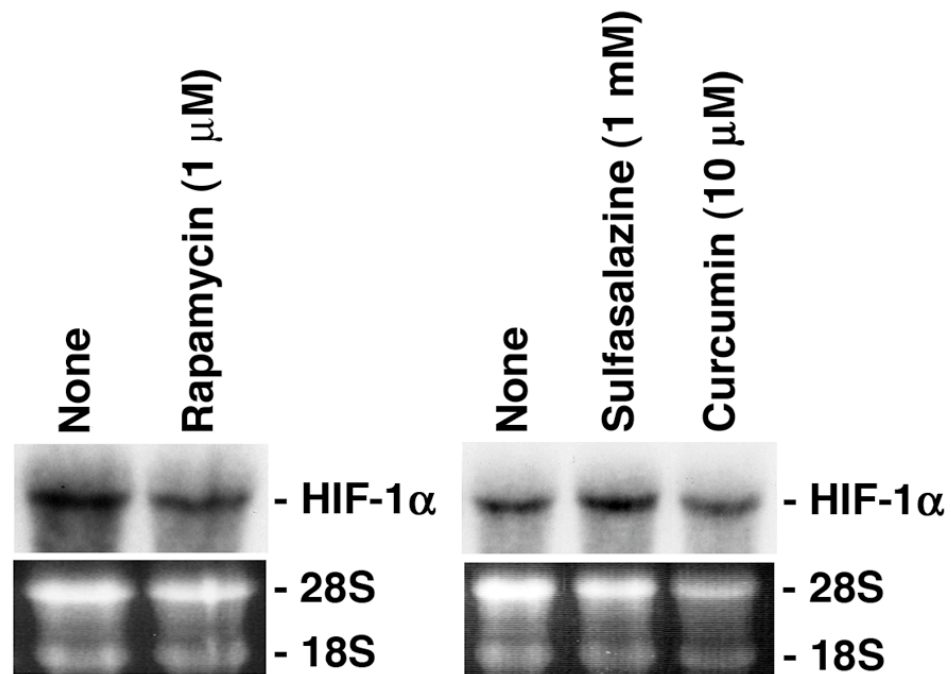

**Figure S3. Rapamycin, sulfasalazine and curcumin do not inhibit the expression of *HIF-1α* mRNA in A11 cells.** A11 cells were treated with the reagents at the indicated concentration for 24 h. Total RNA was extracted and subjected to Northern blot analysis. The blots were hybridized with a <sup>32</sup>P-labeled *HIF-1α* cDNA. Ethidium bromide staining of the gel is also shown.
